# Supplementary material for: A gene expression signature of FOXM1 predicts the prognosis of hepatocellular carcinoma
Source: PubMed Central journal article supplement — Exp Mol Med. 2018 Jan 5;50(1):e418–. doi: 10.1038/emm.2017.159 (PMC5992987; doi:10.1038/emm.2017.159), 2018-01-05

## Supplementary Figure Legends

### **Supplementary Figure 1. Gene expression patterns of the co-expressed gene set of *FOXMI* in the Pan-cancer cohort.**

A total of 722 genes with expression patterns that highly correlated with *FOXMI* were selected for cluster analysis. Patients were divided into the following two subgroups: *FOXMI*-high (FH) and *FOXMI*-low (FL).

### **Supplementary Figure 2. Gene set enrichment analysis of the co-expressed gene set of *FOXMI* that was associated with the prognosis of HCC patients.**

Classification enrichment was determined using the Ingenuity Pathway Analysis tool ([www.ingenuity.com](http://www.ingenuity.com)). The threshold of significance was  $-\log(P = 0.05)$ .

### **Supplementary Figure 3. Comparison of expression levels between *FOXMI*-high (FH) and *FOXMI*-low (FL) subgroups in the TCGA cohort.**

Two group box plots comparing the expression levels of (a) *FOXMI* and (b) miR-34a in the FH and FL subgroups. The *P*-value was obtained by two-sample *t*-test between FH and FL. The value of *r* indicates the correlation coefficient of the gene compared to *FOXMI*. The expression level of miR-34a was inversely correlated with the gene expression level of *FOXMI*.

FL

FH

Subgroups  
Cancer types

← *FOXM1*

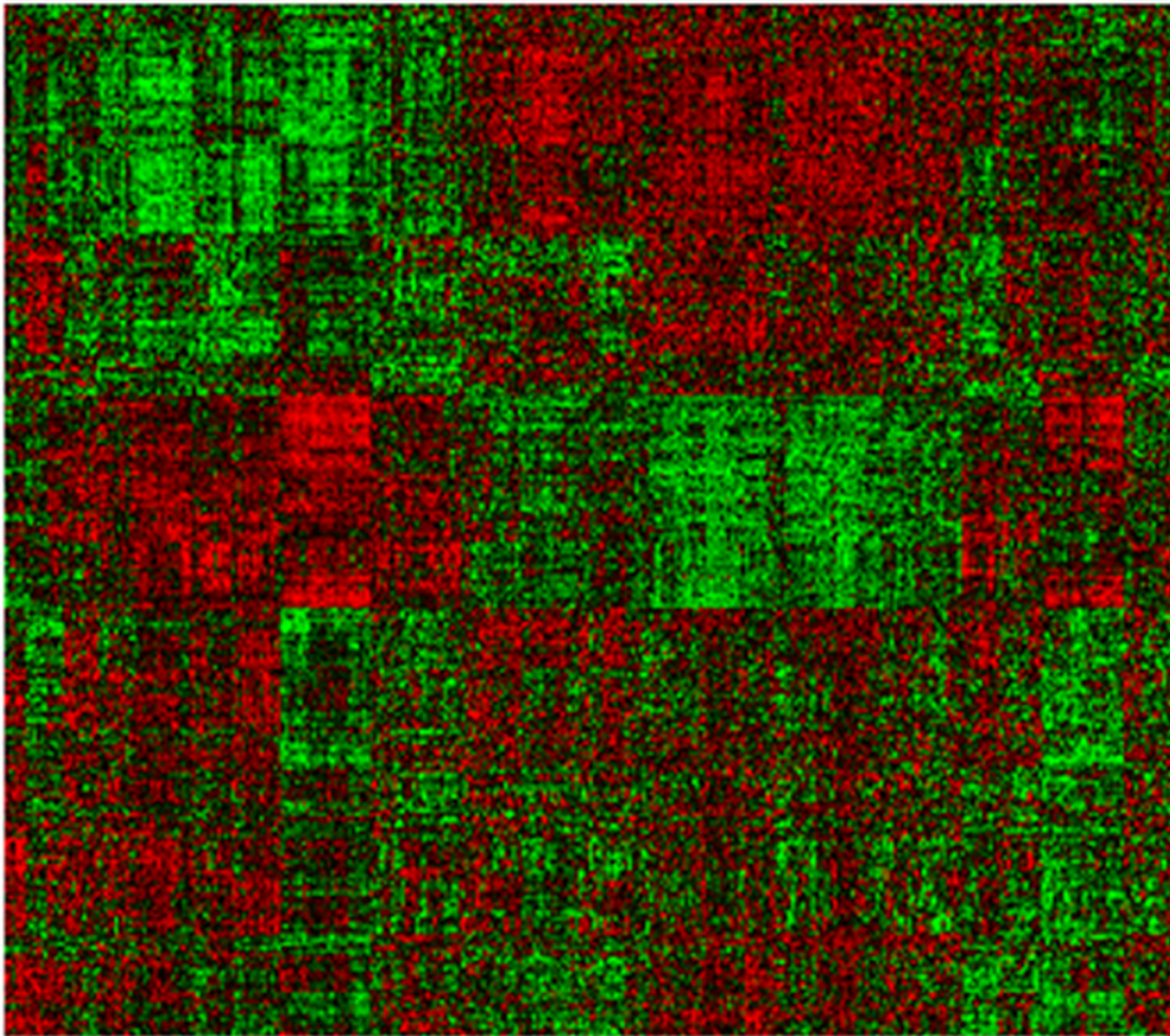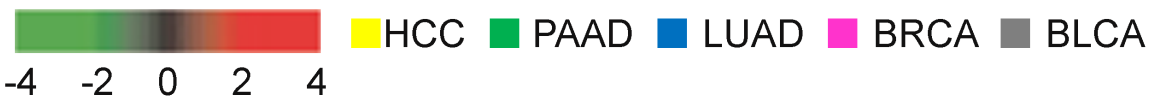

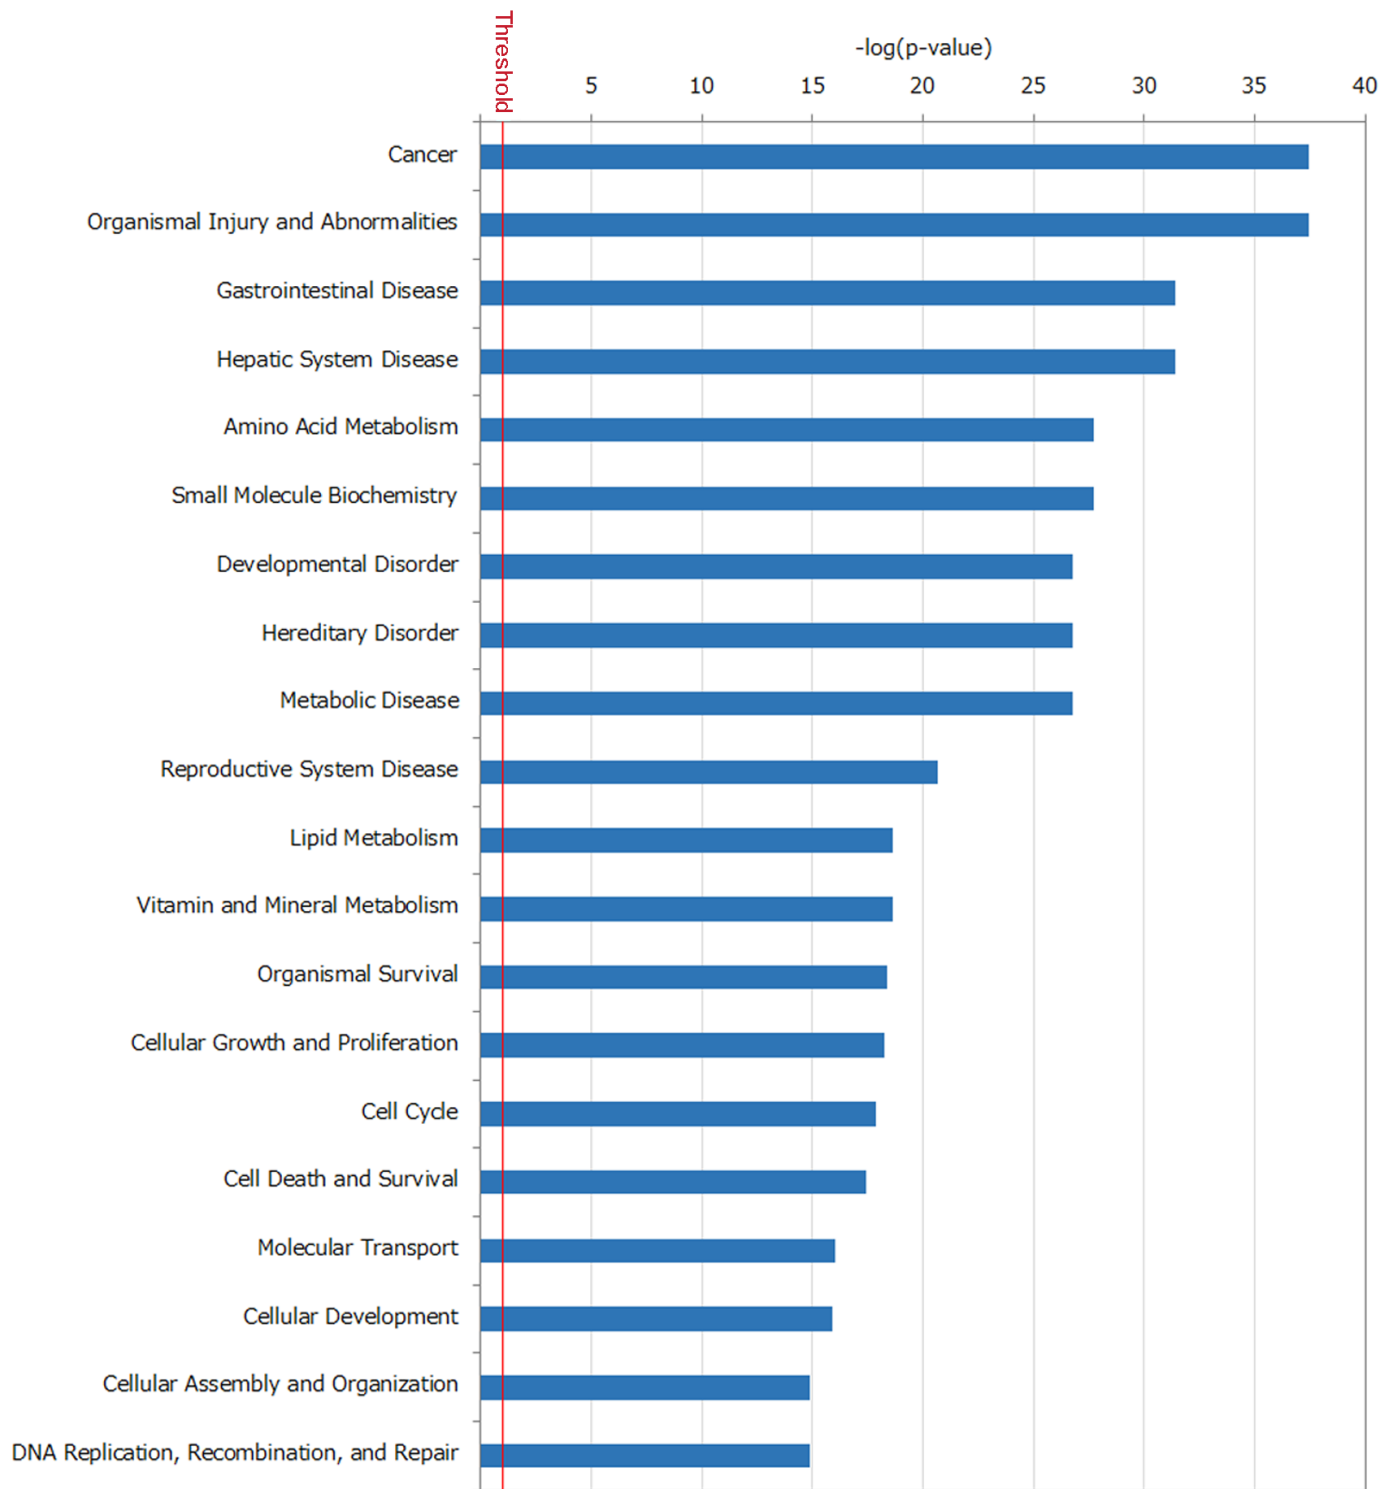

**a**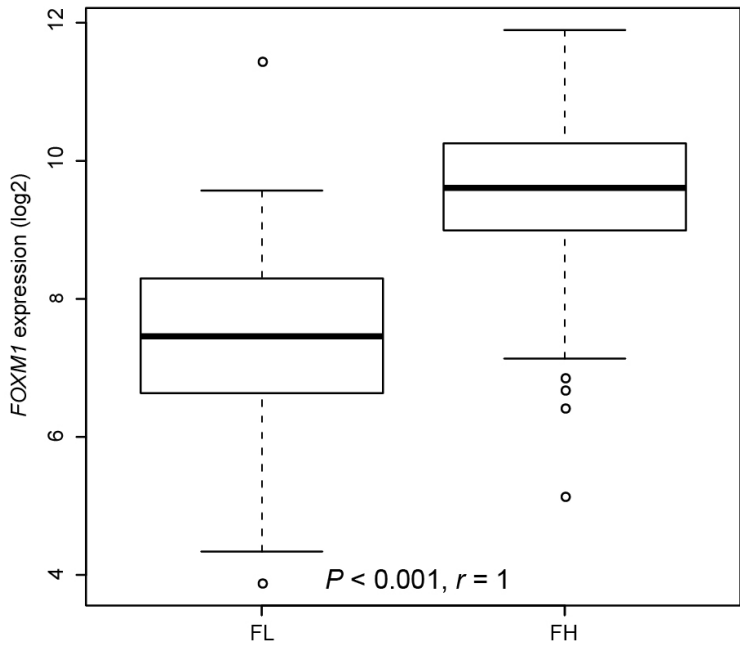**b**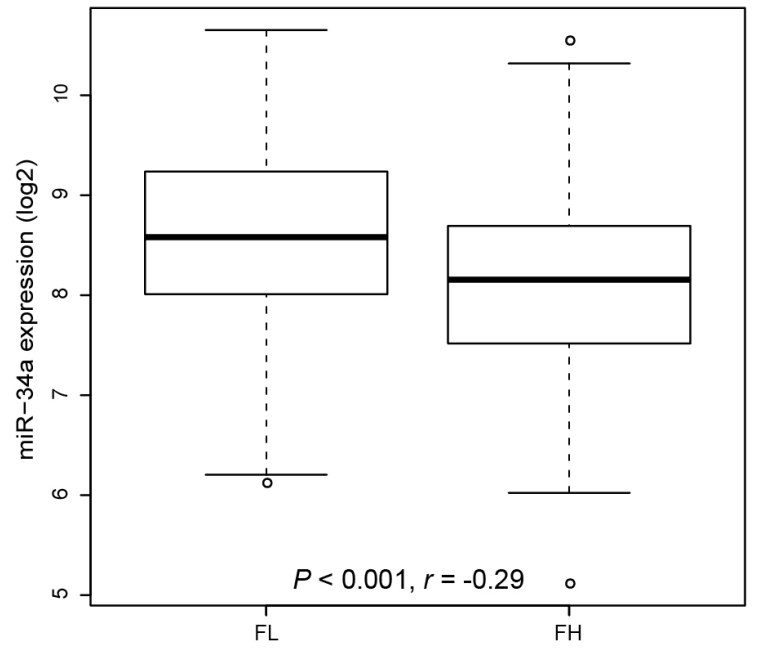

Supplement: emm2017159x2.pdf [file emm2017159x2.pdf]
